1 **Diverse RNA viruses associated with diatom, eustigmatophyte,**  
2 **dinoflagellate and rhodophyte microalgae cultures**

3

4

5 Justine Charon<sup>a</sup>, Tim Kahlke<sup>b</sup>, Michaela E. Larsson<sup>b</sup>, Raffaella Abbriano<sup>b</sup>, Audrey  
6 Commault<sup>b</sup>, Joel Burke<sup>b</sup>, Peter Ralph<sup>b</sup>, Edward C. Holmes<sup>a\*</sup>

7

8

9

10 <sup>a</sup>Sydney Institute for Infectious Diseases, School of Life and Environmental Sciences and  
11 Sydney Medical School, The University of Sydney, Sydney, NSW 2006, Australia.

12 <sup>b</sup>Climate Change Cluster (C3), Faculty of Science, University of Technology Sydney, NSW,  
13 Australia.

14

15

16 \*Author for correspondence:

17 Edward C. Holmes,

18 Sydney Institute for Infectious Diseases, School of Life and Environmental Sciences and  
19 Sydney Medical School, The University of Sydney, Sydney, NSW 2006, Australia.

20 [edward.holmes@sydney.edu.au](mailto:edward.holmes@sydney.edu.au)

21

22

23 Word count = Abstract = 223 words; Main text = 4740 words

24

25 Running title: RNA virus sequences in microalgae cultures.

## 26 **Abstract**

27 Unicellular microalgae are of immense ecological importance with growing commercial  
28 potential in industries such as renewable energy, food and pharmacology. Viral infections  
29 can have a profound impact on the growth and evolution of their hosts. However, very little is  
30 known of the diversity within, and effect of, unicellular microalgal RNA viruses. In addition,  
31 identifying RNA viruses in these organisms that could have originated more than a billion  
32 years ago constitutes a robust data set to dissect molecular events and address  
33 fundamental questions on virus evolution. We assessed the diversity of RNA viruses in eight  
34 microalgal cultures including representatives from the diatom, eustigmatophyte,  
35 dinoflagellate, red algae and euglenid groups. Using metatranscriptomic sequencing  
36 combined with bioinformatic approaches optimised to detect highly divergent RNA viruses,  
37 we identified ten RNA virus sequences, with nine constituting new viral species. Most of the  
38 newly identified RNA viruses belonged to the double-stranded *Totiviridae*, *Endornaviridae*  
39 and *Partitiviridae*, greatly expanding the reported host range for these families. Two new  
40 species belonging to the single-stranded RNA viral clade *Marnaviridae*, commonly  
41 associated with microalgal hosts, were also identified. This study highlights that a great  
42 diversity of RNA viruses likely exists undetected within the unicellular microalgae. It also  
43 highlights the necessity for RNA viral characterisation and to investigate the effects of viral  
44 infections on microalgal physiology, biology and growth, considering their environmental and  
45 industrial roles.

46

## 47 **Importance**

48 In comparison to animals or plants, our knowledge of the diversity of RNA viruses infecting  
49 microbial algae – the microalgae – is minimal. Yet describing the RNA viruses infecting  
50 these organisms is of primary importance at both the ecological and economical levels  
51 because of the fundamental roles these organisms play in aquatic environments and their  
52 growing value across a range of industrial fields. Using metatranscriptomic sequencing we  
53 aimed to reveal the RNA viruses present in cultures of eight microalgae species belonging to  
54 the diatom, dinoflagellate, eustigmatophyte, rhodophyte and euglena major clades of algae.  
55 This work identified ten new divergent RNA virus species, belonging to RNA virus families as  
56 diverse as the double-stranded *Totiviridae*, *Endornaviridae*, *Partitiviridae* and the single-  
57 stranded *Marnaviridae*. By expanding the known diversity of RNA viruses infecting  
58 unicellular eukaryotes, this study contributes to a better understanding of the early evolution  
59 of the virosphere and will inform the use of microalgae in industrial applications.

## 60 **Introduction**

61 Viruses are often considered the most ancient “life forms” (*i.e.* replicatory agents). As studies  
62 of the viromes of increasingly diverse taxa proceed, the more their remarkable ubiquity,  
63 diversity and abundance becomes apparent<sup>1</sup>. RNA viruses are by far the most abundant  
64 microorganisms in marine systems<sup>2</sup> and play fundamental roles in these environments by  
65 infecting and regulating phytoplankton populations<sup>2</sup>. RNA viruses that infect unicellular  
66 photosynthetic microalgae are also of primary importance for marine resource management  
67 due to the significant ecotoxicological effect of some microalgal hosts, including abundant  
68 dinoflagellate species<sup>3</sup>. There is also growing awareness of the value of microalgal cultures  
69 for biofuels, pharmacology, water treatment, food and the aquacultural industries<sup>4–7</sup>. Indeed,  
70 the intensive commercial cultivation and production of microalgae populations could be  
71 seriously impacted by viral disease outbreaks<sup>8</sup>. Accordingly, an extensive description of the  
72 RNA virus diversity in unicellular microalgae is of importance to better understand their role  
73 and impact on natural microalgal populations and in anticipating the consequences of  
74 industrial cultivation.

75

76 Knowledge of the RNA virosphere in overlooked eukaryotic lineages that evolved billions of  
77 years ago – such as the microalgae – could significantly enhance our understanding of the  
78 earliest events in RNA virus evolution. With barely 100 species of RNA viruses reported  
79 since the first isolation of a microalgae-infecting RNA virus in 2003<sup>9</sup>, our current knowledge  
80 of RNA viruses infecting microalgae is limited, representing less than 0.5% of the RNA  
81 viruses for which hosts have been formally established<sup>10</sup>. This lack of knowledge most likely  
82 reflects the historical focus on viruses that cause disease in humans and bioresources  
83 (domestic animals, animal and insect vector, plants) rather than those infecting microbial  
84 eukaryotes.

85

86 The study of global viromes has been revolutionised by metagenomics. By avoiding  
87 cultivation limitations and paving the way for the exploration of very diverse environments  
88 (soil, water, etc.), the metagenomic era has multiplied the number of RNA viruses described  
89 by many thousands<sup>10–13</sup>. This is particularly evident in the field of “phycovirology” (the study  
90 of algal viruses), for which recent studies investigating RNA viruses using metagenomic  
91 approaches have revealed a high diversity and prevalence of RNA viruses in several  
92 microalgae lineages<sup>11,14–21</sup>. While the positive-sense single-strand (ss+) picorna-like  
93 *Marnaviridae* are the best described family of microalgae-infecting viruses<sup>11,22,23</sup>,  
94 metagenomic studies continue to expand the diversity of microalgal viruses, including  
95 identification of the double-strand (ds) RNA viruses from the orders *Ghabrivirales*  
96 (*Totiviridae*-like), *Durnavirales* (*Partitiviridae*-like) and *Martellivirales* (*Endornaviridae*-

97 like)<sup>19,20,24–26</sup>, as well as ss+ RNA viruses from the *Sobelivirales* (*Alvernaviridae*),  
98 *Nodamuvirales* (*Nodaviridae*), *Wolframvirales* (*Narnaviridae*) and *Cryppavirales* (*Mitoviridae*)  
99 phyla<sup>19,20,24,27,28</sup>. To date, the majority of the microalgal hosts documented to contain RNA  
100 viruses are from the Bacillariophyta (diatom) and Dinoflagellata (dinoflagellate) lineages.  
101 However, some viruses have been reported from other stramenopile hosts (such as  
102 Phaeophytes, Raphidophytes and Xanthophytes)<sup>9,20,28–30</sup> and in some other major groups of  
103 microalgae such as the *Rhizaria*<sup>9,20</sup>, Chlorophyta<sup>19,31</sup>, Rhodophyta<sup>20,25,26</sup> and more recently  
104 Haptophyta<sup>20</sup>.

105

106 To increase our understanding of the RNA virosphere in microalgae we assessed the  
107 diversity of RNA viruses in eight microalgal species, covering the major groups of  
108 stramenopiles, including eustigmatophytes (*Nannochloropsis oceanica*, *Nannochloropsis*  
109 *oculata*) and diatoms (*Thalassiosira weissflogii*), alveolates including dinoflagellates  
110 (*Prorocentrum* cf. *balticum*, *Prorocentrum lima*, *Gambierdiscus carpenteri*), red algae  
111 (*Rhodella maculata*) and euglenid (*Euglena gracilis*). By using a “culture-based”  
112 metatranscriptomic approach we combined the power of unbiased detection of ultra-large-  
113 scale RNA sequencing with the use of mono-organism culture to assist in associating the  
114 viruses identified to their specific algae hosts. Given the high levels of sequence diversity  
115 observed in many RNA viruses, we paid particular attention to identifying divergent virus-like  
116 sequences.

117

## 118 **Results and Discussion**

119 We searched for RNA virus sequences associated with cultures of eight unicellular  
120 microalgal species, representing four major algal groups: stramenopiles, alveolates,  
121 rhodophytes and euglenozoa (Figure 1).

122

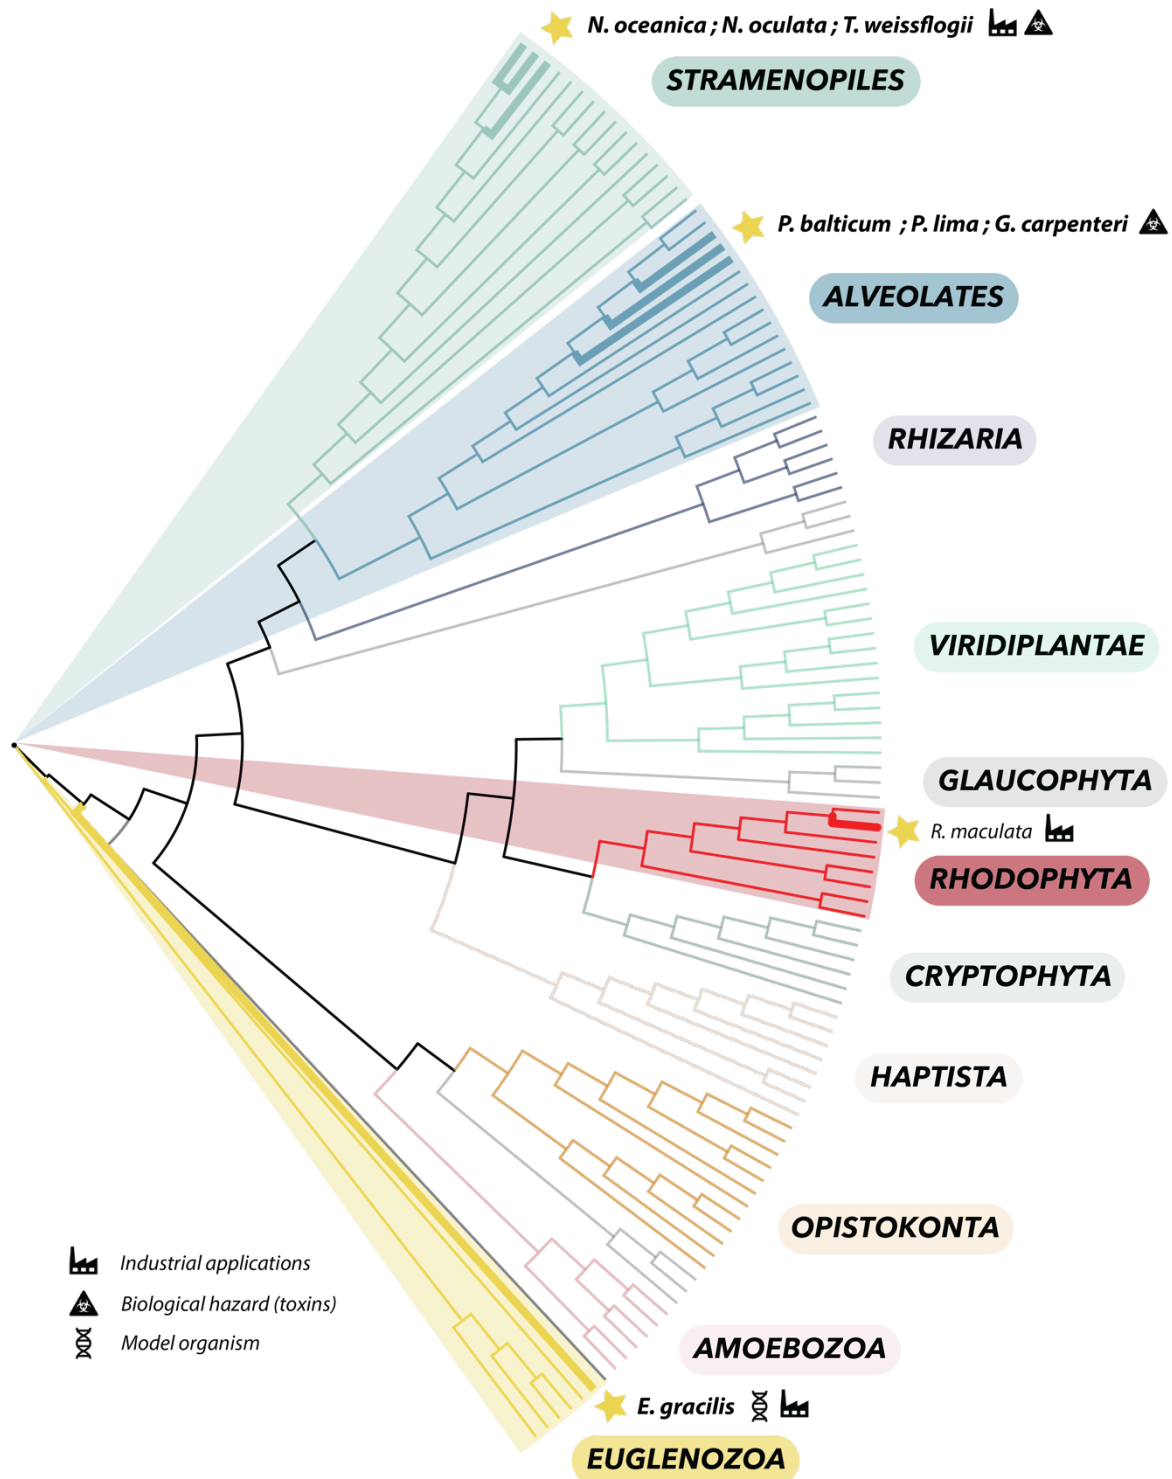

123

124 **Figure 1. Phylogenetic position of microalgal species used in this study among the**  
125 **global Eukaryote phylogeny.** Microalgal species names are indicated in italics and their  
126 main applications (industrial, biological hazard (toxins) and model organisms) are specified  
127 by icons. Species for which no RNA viruses were reported prior to this study are indicated in  
128 bold. The Eukaryote cladogram was adapted from ref.<sup>32</sup>.

129

130 Following total RNA extraction from each microalgal culture, metatranscriptomic sequencing  
131 was used to obtain deep transcriptomes. The corresponding RNAs and data yields for each  
132 microalgal sample/library are detailed in Table A1 and Figure A1. By combining a standard  
133 metagenomic bioinformatic pipeline with the protein HMM-profile and structural comparison  
134 developed in RdRp-scan<sup>33</sup> we were able to identify ten new viral-like sequences (Table 1).  
135 With the exception of the unicellular red algae *Rhodella maculata*, recently associated with  
136 the *Despoena mito-like virus*<sup>20</sup>, these represent the first reports of viruses in each microalgal  
137 species investigated (Figure 1). The ten viral sequences found in this study were compared  
138 to the genomic sequences of the corresponding algal host whenever possible (Table A2).  
139 Accordingly, nine of the ten viral sequences identified were not found in the host genome  
140 and therefore treated as exogenous viruses (Table 1). In contrast, the viral signal detected  
141 from *Euglena gracilis* using HMM-based approach was identical to *Euglena* genome  
142 sequences (Table 1) and hence likely corresponds to an endogenous viral element (EVE;  
143 see below).

144

145 To eliminate contamination during the library preparation or sequencing, we tested the  
146 presence of all viruses in total RNA samples using RT-PCR (Figure A2). This resulted in the  
147 detection of 8 of the 11 virus/samples tested (Table 1 and Figure A2). Triopas ghabri-like  
148 virus 1 could not be detected in *P. cf. balticum* RNAs (Figure A2), likely because of the very  
149 low abundance of this viral contig (Table 1). Megareus marna-like virus 1 and Minyas marna-  
150 like virus 1, both associated with the *N. oculata* sample, similarly could not be confirmed  
151 using RT-PCR. In addition, the positive control used to target the *N. oculata* internal  
152 transcribed spacer (ITS) sequence did not return any PCR signal (Figure A2). Hence, the  
153 meagre quantity of total RNA extracted from *N. oculata* cultures may explain the difficulty in  
154 validating both host gene and associated viruses using RT-PCR (Table A1).

155

### 156 **Placement of the newly identified microalgal viruses within global RNA virus diversity**

157 To characterise the newly-identified viruses, we first used phylogenetic analysis to place the  
158 new viral sequences within the diversity of viral RNA-dependent RNA polymerase (RdRp)  
159 sequences at the phylum level using the recently developed RdRp-scan resource<sup>33</sup>. These  
160 large-scale phylogenies show that the viral sequences identified fell in diverse positions  
161 among those RNA viruses identified to date, with two belonging to the *Duplornaviricota*, two  
162 falling into the *Kitrinoviricota*, and six sharing homologies at amino acid level with  
163 *Pisuviricota* viruses (Figure 2).

164

165

**Table 1. List of new viruses and endogenous viral elements found in this study.** EVE: endogenous viral element. Full-length versus

166

partial information was hypothesized from genomic length and organisation.

| Virus name                    | Host (lineage)                                     | RdRp phylum/order related                       | RT-PCR validated? Virus/Host | Coverage (quality/nb reads) | length | Full-length vs partial        | Exogenous vs EVE |
|-------------------------------|----------------------------------------------------|-------------------------------------------------|------------------------------|-----------------------------|--------|-------------------------------|------------------|
| Taphios ghabri-like virus 1   | <i>Nannochloropsis oceanica</i> (Eustigmatophyte)  | Duplornaviricota/Ghabrivirales                  | YES/YES                      | GOOD/13,769                 | 4876   | Likely Complete               | Exogenous        |
| Taphios ghabri-like virus 1   | <i>Thalassiosira weissflogii</i> (Eustigmatophyte) | Duplornaviricota/Ghabrivirales                  | YES/YES                      | GOOD/876                    | 4835   | Likely Complete               | Exogenous        |
| Triopas ghabri-like virus 1   | <i>Prorocentrum cf. balticum</i> (Dinophyceae)     | Duplornaviricota/Ghabrivirales                  | NO/YES                       | AVERAGE/70                  | 1425   | Partial                       | Exogenous        |
| Diktys durna-like virus 1     | <i>Prorocentrum lima</i> (Dinophyceae)             | <i>Pisuviricota/Durnavirales</i> – Partitivirus | YES/YES                      | GOOD/24,826                 | 1826   | Partial (1 segment missing ?) | Exogenous        |
| Orion durna-like virus 1      | <i>Gambierdiscus carpenteri</i> (Dinophyceae)      | <i>Pisuviricota/Durnavirales</i>                | YES/YES                      | GOOD/1,198                  | 2077   | Partial (1 segment missing ?) | Exogenous        |
| Almopos endorna-like virus 1  | <i>Gambierdiscus carpenteri</i> (Dinophyceae)      | <i>Kitrinoviricota/Martellivirales</i>          | YES/YES                      | GOOD/54,823                 | 21494  | Likely Complete               | Exogenous        |
| Althepos endorna-like virus 1 | <i>Gambierdiscus carpenteri</i> (Dinophyceae)      | <i>Kitrinoviricota/Martellivirales</i>          | YES/YES                      | GOOD/460                    | 4825   | Likely Complete               | Exogenous        |
| Phineus pisuviri-like virus 1 | <i>Rhodella maculata</i> (Rhodophyta)              | <i>Pisuviricota/Picornavirales</i>              | YES/YES                      | GOOD/14,972                 | 6398   | Likely Complete               | Exogenous        |
| Megareus marna-like virus 1   | <i>Nannochloropsis oculata</i> (Stramenopiles)     | <i>Pisuviricota/Picornavirales</i>              | NO/NO                        | GOOD/425                    | 1222   | Partial                       | Exogenous        |
| Minyas marna-like virus 1     | <i>Nannochloropsis oculata</i> (Stramenopiles)     | <i>Pisuviricota/Picornavirales</i>              | NO/NO                        | GOOD/472                    | 1130   | Partial                       | Exogenous        |
| Pisuviri-like signal          | <i>Euglena gracilis</i> (Euglenozoa)               | <i>Pisuviricota</i> /Uncertain placement        | YES/YES                      | GOOD/1,531                  | 1484   | EVE                           | EVE              |

167



168

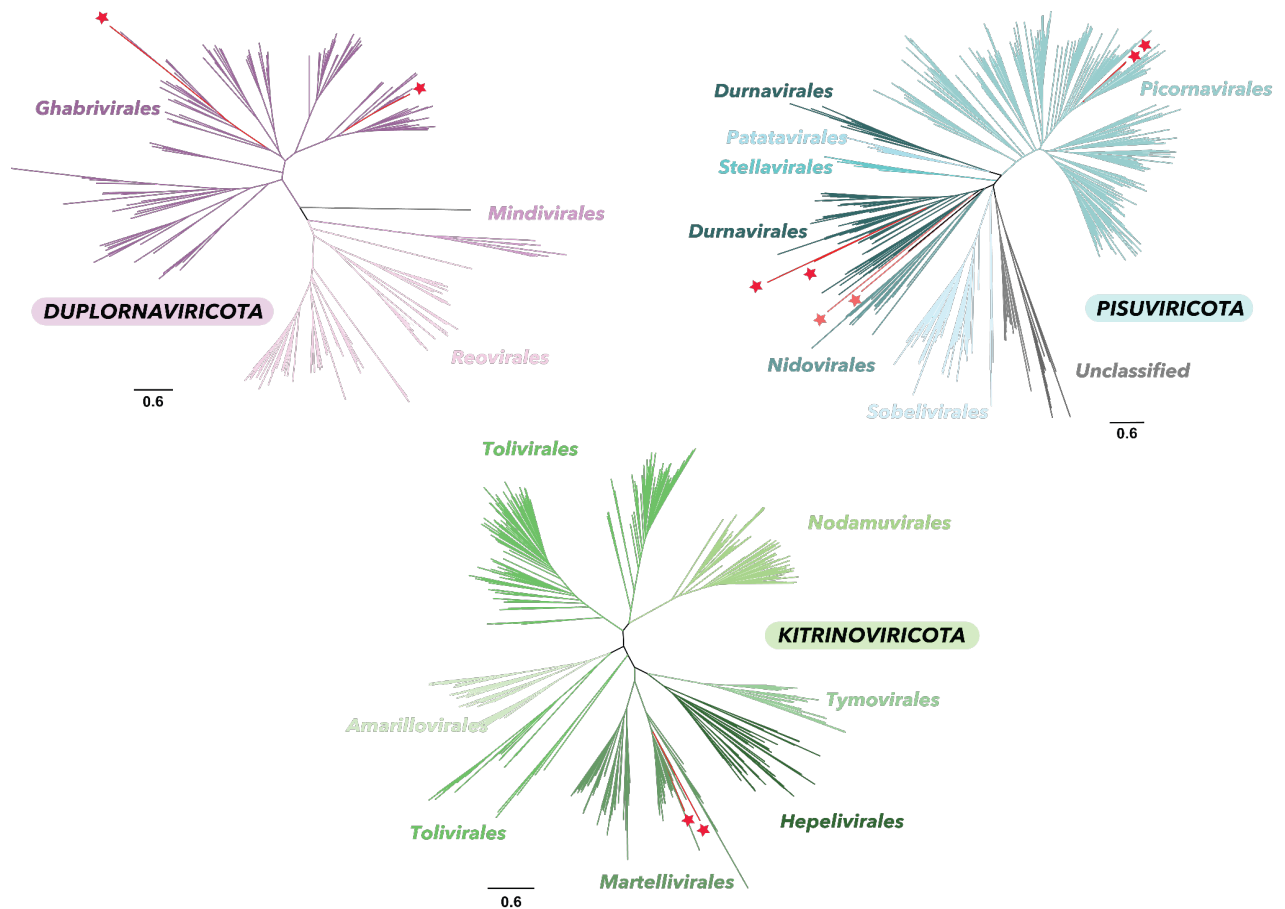

169

170 **Figure 2. Phylogenetic placement of the newly identified viruses within the diversity of**

171 ***Riboviria* phyla.** Unrooted ML trees. Red stars indicate the viruses newly identified. Light

172 red stars represent RdRp-like sequences obtained using the HMM-based RdRp-scan

173 method. Scale bars represent the number of amino acid substitutions per site.

174

175 We then conducted additional phylogenetic analyses focusing on the viral sub-clades that

176 contained the ten newly identified sequences. These comprised the *Ghabrivirales*,

177 *Endornaviridae*, *Durnavirales* and *Marnaviridae* lineages and are described below.

178

179 ***New microalgae-infecting viruses suggest a TSAR-infecting Totiviridae genus***

180 Among the ten viral sequences identified in this study, two were related to *Totiviridae*-like

181 viruses (Table 1 and Figure 2). *Triopas ghabri*-like virus 1, identified in the dinoflagellate *P.*

182 *cf. balticum*, forms a clade with *Arion toti*-like virus identified in the dinoflagellate *P.*

183 *bahamense*<sup>20</sup>. Together, these two viruses group with those previously reported in

184 microalgae and oomycete hosts (Figure 3).

185



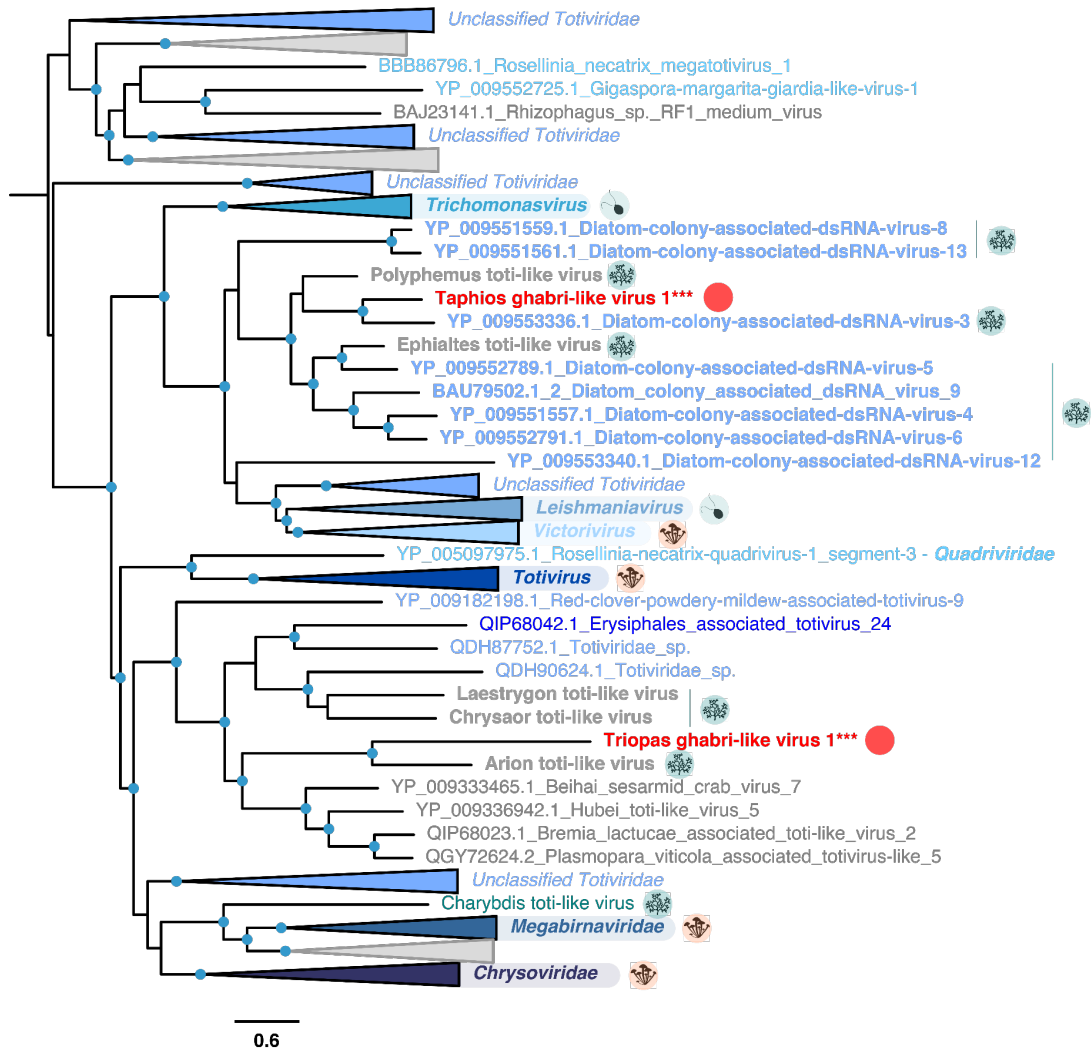

186

187 **Figure 3. Phylogeny of the Ghabrivirales.** Sequences in grey denote previously  
 188 unclassified viruses while those in bold refer to microalgae-associated viruses. Host lineages  
 189 are indicated in circles to the right of major viral clade labels and correspond to fungi  
 190 (orange), protozoa (light blue) and microalgae (blue). The new viral sequences identified in  
 191 this study are indicated with a red circle. The tree is mid-rooted and confident nodes (with  
 192 SH-*alrt* likelihood ratio test values  $\geq 80\%$ ) are represented as circles. The scale bar  
 193 represents the number of amino acid substitutions per site.

194

195 The short length of the RdRp-encoding segment identified here – 1.4 kb – suggests that the  
 196 genome of *Triopas ghabri-like virus 1* is partial (Figure A3). While this limits the discussion of  
 197 genomic attributes, an additional open reading frame (ORF) in reverse-orientation and  
 198 without any known function associated, was predicted using the standard genetic code.  
 199 Such use of anti-sense ORF would constitute an original feature in the *Totiviridae* (Figure  
 200 A3). *Triopas ghabri-like virus 1* associated RNAs were found at very low abundance in the *P.*  
 201 *cf. balticum* sample and could not be confirmed experimentally by RT-PCR (Table 1, Figure

202 A2). Although this viral sequence requires additional validation, it supports previous  
203 suggestions of dinoflagellate-infecting *Totiviridae*<sup>20</sup> and constitutes further evidence for  
204 recognizing a new TSAR-infecting (Telonemid, Stramenopile, Alveolate and *Rhizaria*  
205 supergroup) genus within the *Totiviridae*<sup>20</sup>.

206

207 A second Toti-like virus, Taphios ghabri-like virus 1, was found in the eustigmatophyte *N.*  
208 *oceanica* and the diatom *T. weissflogii*. It forms a clade with the algae-associated  
209 Polyphemus and Ephialtes toti-like viruses, both previously identified in *Astrosyne radiata*  
210 (diatom) samples<sup>20</sup>. They also form a sister clade to the *Trichomonasvirus*, *Victorivirus* and  
211 *Leishmanivirus* genera, infecting protozoan parasites and fungi<sup>34–36</sup>. To consolidate the  
212 host-virus relationship and potentially elongate the genomic sequence, we screened for the  
213 presence of the newly described viruses in additional host transcriptomes available in the  
214 Sequence Read Archive (SRA) (Table A3). Accordingly, Taphios ghabri-like virus 1  
215 sequences were observed in one transcriptome (SRR12347810) of the diatom  
216 *Phaeodactylum tricornutum*, with only eight single nucleotide polymorphisms (SNP) reported  
217 at the genome level.

218

219 The total length of the Taphios ghabri-like virus 1 sequence, at 4.8kb, is in the range of other  
220 *Totiviridae* and, along with the read coverage profile, suggests that the full-length genome  
221 has been obtained (Figure A3). The organisation of the Taphios ghabri-like virus 1 genome  
222 into two overlapping ORFs, probably translated with a +1 ribosomal frameshift, corresponds  
223 to the genomic features commonly observed among the *Totiviridae*. The first ORF likely  
224 encodes a coat protein, while no annotations could be retrieved from InterProScan analysis  
225 for this ORF<sup>37</sup>. We hypothesise from the placement within the *Totiviridae* phylogeny and the  
226 similarities in genome organisation and length that this virus has a dsRNA genome.  
227 Combined, the results from RdRp phylogenies, genome organisation and host range are in  
228 accord with establishing a new *Totiviridae* genus infecting diatom and eustigmatophyte  
229 hosts.

230

231 The observation of *Totiviridae* likely infecting dinoflagellates, diatoms and eustigmatophyte  
232 hosts aligns with the suspected ubiquity of these dsRNA viruses in microalgae<sup>20</sup> and  
233 unicellular eukaryotes more generally<sup>38</sup>. Notably, the *Totiviridae* have been associated with  
234 changes in host fitness and to hyper- or hypovirulence of some of their hosts<sup>39–41</sup>. The  
235 effects of the newly discovered *Totiviridae* genus on corresponding dinoflagellate, diatom  
236 and eustigmatophyte microalgal cultures require additional investigation and could be of  
237 interest considering their potential effects on growth, including that of harmful algal blooms  
238 (HABs), and commercial cultivation yields.

239  
240  
241  
242  
243  
244  
245  
246

### **First association of alphaendornavirus with dinoflagellates**

Two of the viruses identified in this study cluster within the *Endornaviridae* family of dsRNA viruses. Specifically, Althepos endorna-like virus 1 and Almopos endorna-like virus 1 (both retrieved from *Gambierdiscus carpenteri* – Dinophyceae) group with members of the alphaendornavirus genus, a genus within the *Endornaviridae* previously associated with land plants, fungi and oomycetes<sup>42</sup> (Figure 4).

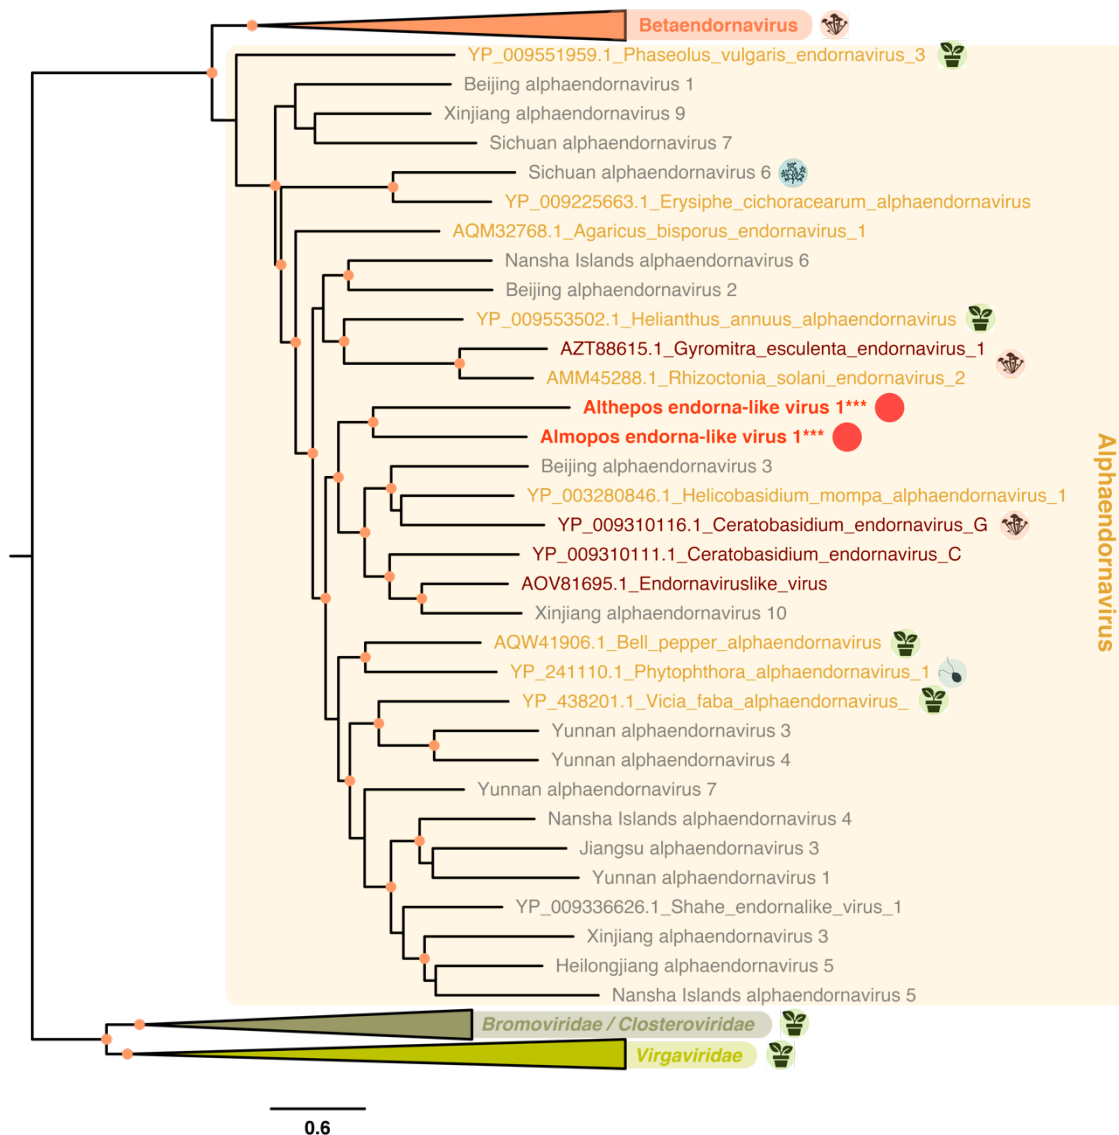

247  
248  
249  
250  
251  
252

**Figure 4. Phylogeny of the *Endornaviridae*.** Sequences in grey indicate unclassified viruses and sequences in bold refer to microalgal-associated viruses. Host lineages are indicated in circles to the right of major viral clades and correspond to fungi (orange), land plants (green), protozoa (light blue) and microalgae (blue). The new viral sequences identified in this study are indicated with a red circle. The Sichuan alphaendornavirus cluster

253 includes the diatom-associated RNA virus 15, previously reported from diatom-containing  
254 samples<sup>18</sup>. The tree is mid-rooted and confident nodes (with SH-*alrt* likelihood ratio test  
255 values  $\geq 80\%$ ) are represented as orange circles. The scale bar represents the number of  
256 amino acid substitutions per site.

257

258 *Endornaviridae* dsRNA genomes are 9.7 to 17.6 kb in length and encode a single  
259 polyprotein with a RdRp domain located in the Cter<sup>38</sup>. The genome organisation of Almopos  
260 endorna-like virus 1 therefore possesses features common to the *Endornaviridae* (Figure  
261 A4), except for its genome size of ~21kb which is the longest genome reported to date for  
262 this group. In addition to the viral RdRp domain located in the Cter region of the Almopos  
263 endorna-like virus 1 protein, other protein domains and signatures could be identified that  
264 were related to the (+)RNA virus helicase core (IPR027351), the YbiA-like (IPR037238) and  
265 the UDP-Glycosyltransferase/glycogen phosphorylase superfamilies (SSF53756) (Figure  
266 A4), similar to the previous studies<sup>43-46</sup>. It is very likely that other viral proteins and functions  
267 are encoded but are too divergent to be identified. The investigation of these additional  
268 divergent viral translated products could be of significant importance for both revealing the  
269 evolutionary origins of the *Endornaviridae*<sup>47</sup>.

270

271 The Altheapos endorna-like virus 1 sequence is only 4.8kb in length and likely represents a  
272 partial genome. Additional read mapping using our metagenomic or SRA-based data did not  
273 allow the retrieval of the full-length sequence (Figure A4). Whether Altheapos endorna-like  
274 virus 1 and Almopos endorna-like virus 1 impact the fitness of their *G. carpenteri* host  
275 remains to be investigated but might have significant implications for the management of this  
276 potentially harmful species<sup>48</sup>. Considering the persistent lifestyle reported for  
277 endornaviruses<sup>49</sup> and the high similarities in terms of RdRp homologies and genomic  
278 organisation, it is likely that Altheapos endorna-like virus 1 and Almopos endorna-like virus 1  
279 share the same infectious properties as other members of the genus *Alphaendornavirus* and  
280 might therefore constitute another example of capsid-less persistent viruses associated with  
281 protist hosts. Importantly, Altheapos endorna-like virus 1 and Almopos endorna-like virus 1  
282 identified from the *G. carpenteri* culture represent the second microalgal-endornavirus  
283 association observed to date<sup>18</sup> and the first report in a dinoflagellate host, strongly  
284 suggesting that a microalgal-specific *Endornaviridae* clade may exist.

285

### 286 ***A new Partitiviridae* genus associated with dinoflagellate hosts**

287 Orion durna-like virus 1 and Diktys durna-like virus 1, observed in *P. lima* (Dinophyceae) and  
288 *G. carpenteri* (Dinophyceae) cultures, respectively, form a clade with the Ourea durna-like  
289 virus previously associated with the dinoflagellate *Dinophysis acuminata*<sup>20</sup> (Figure 5).

290 Specifically, they form a sister clade to the genus *Deltapartitivirus*, belonging to the bi-  
 291 segmented dsRNA *Partitiviridae* that infect fungi and plants<sup>50</sup> and recently associated with  
 292 unicellular algae<sup>20</sup>.  
 293

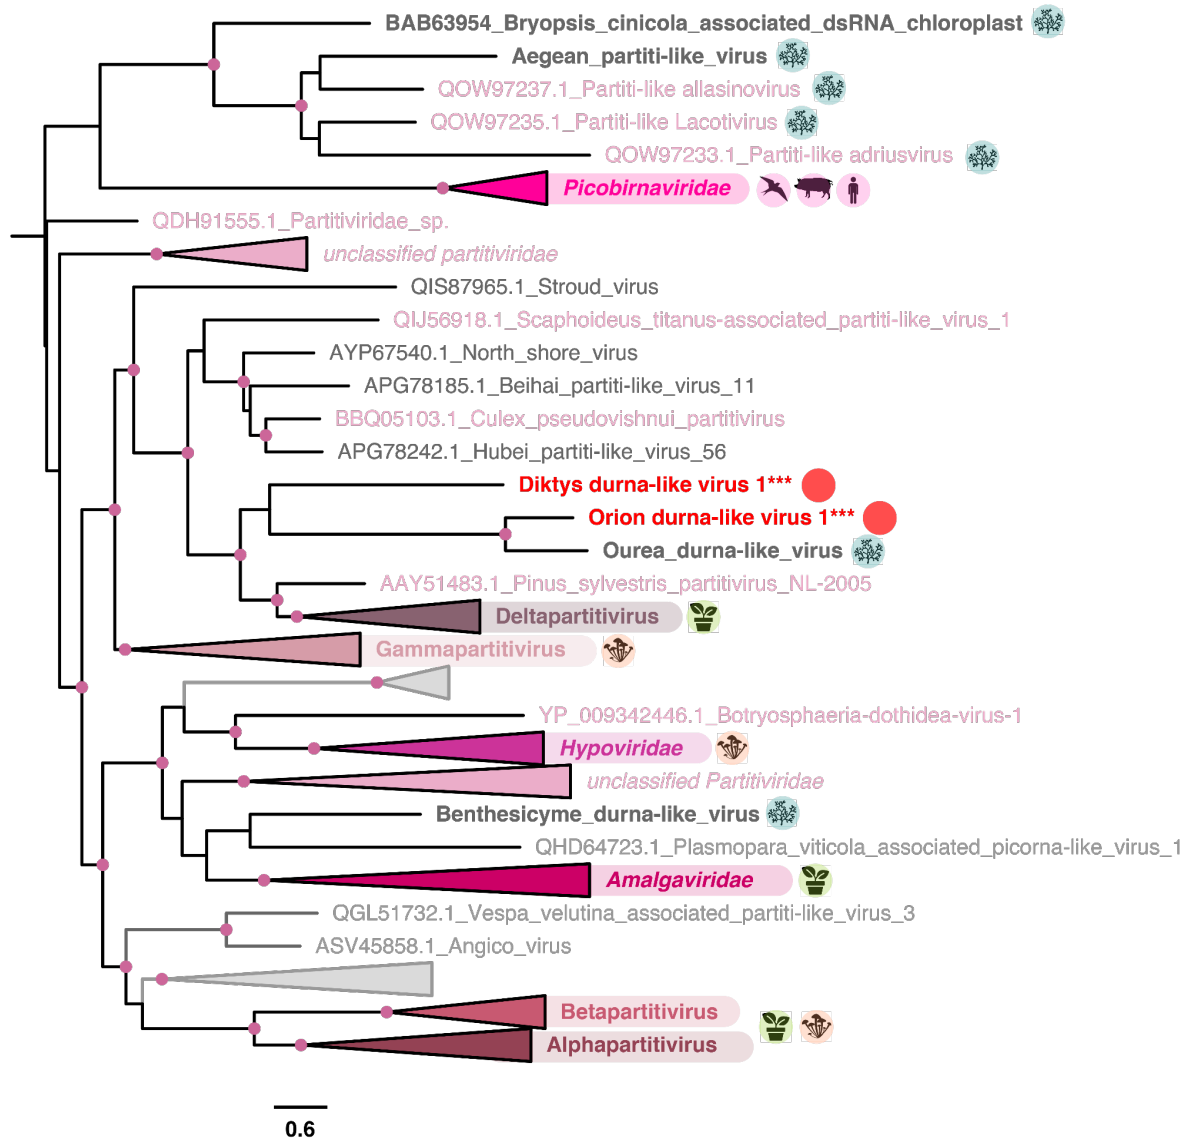

294  
 295 **Figure 5. Phylogeny of the Durnavirales.** Sequences in grey indicate unclassified viruses  
 296 while those in bold refer to microalgal-associated viruses. Host lineages are indicated in  
 297 circles to the right of major viral clades and correspond to metazoa (pink), fungi (orange),  
 298 land plants (green), protozoa (light blue) and microalgae (blue). The new viral sequences  
 299 identified in this study are indicated with a red circle. The tree is mid-rooted and confident  
 300 nodes (with SH-*alrt* likelihood ratio test values  $\geq 80\%$ ) are represented as orange circles.  
 301 The scale bar represents the number of amino acid substitutions per site.

302  
 303 Orion durna-like virus 1 and Diktys durna-like virus 1 genomes (1.8 kb and 2 kb in length,  
 304 respectively) with a single ORF containing the RdRp domain (Figure A5). *Partitiviridae* are

305 bisegmented viruses. Considering the placement of Orion durna-like virus 1 and Diktys  
306 durna-like virus 1 within the *Partitiviridae* phylogeny, it is very likely that they comprise a  
307 second segment, potentially encoding a coat protein not retrieved in this study due to our  
308 RdRp-based retrieval methodology. A complementary comparison of those sequences in the  
309 SRA database identified a sequence with 100% sequence identity at the amino acid level to  
310 Diktys durna-like virus 1 from a *Gambierdiscus polynesiensis* (dinoflagellate) sample  
311 (SRR3358210) (Table A3).

312

313 Together, these results are compatible with establishing a new *Partitiviridae* genus that is  
314 specific to dinoflagellates, comprising Orion durna-like virus 1, Diktys durna-like virus 1 and  
315 the previously identified Ourea durna-like virus. This observation expands the host range  
316 reported for this family, already comprising plants, fungi, oomycetes, apicomplexan parasites  
317 and green algae<sup>19,51–54</sup>. While most of the *Partitiviridae* do not induce symptoms in their  
318 hosts, hypovirulence has been reported in the alpha-, beta- and gammapartitiviruses<sup>55</sup>.  
319 Further analysis is required to assess the effects of Orion durna-like virus 1 and Diktys  
320 durna-like virus 1 on their potentially harmful dinoflagellate hosts *G. carpenteri* and *P.*  
321 *lima*<sup>48,56</sup>.

322

### 323 ***Marnaviridae*-like viruses associated with a *Nannochloropsis oculata* culture**

324 Two newly identified viruses were identified in a *N. oculata* (a eustigmatophyte) sample and  
325 exhibited RdRp sequence similarity with the *Marnaviridae*, a picorna-like family of ss(+)RNA  
326 viruses that infect unicellular eukaryotes (Figure 6). With its taxonomy recently re-assessed  
327 to incorporate viruses from metagenomic studies<sup>22</sup>, the *Marnaviridae* are classified into  
328 seven genera. Accordingly, Minyas marna-like virus 1 belongs to the genus *Locarnavirus*  
329 that comprises viruses derived from marine environment, mollusc and fish-based  
330 metagenomic studies (Figure 6).

331



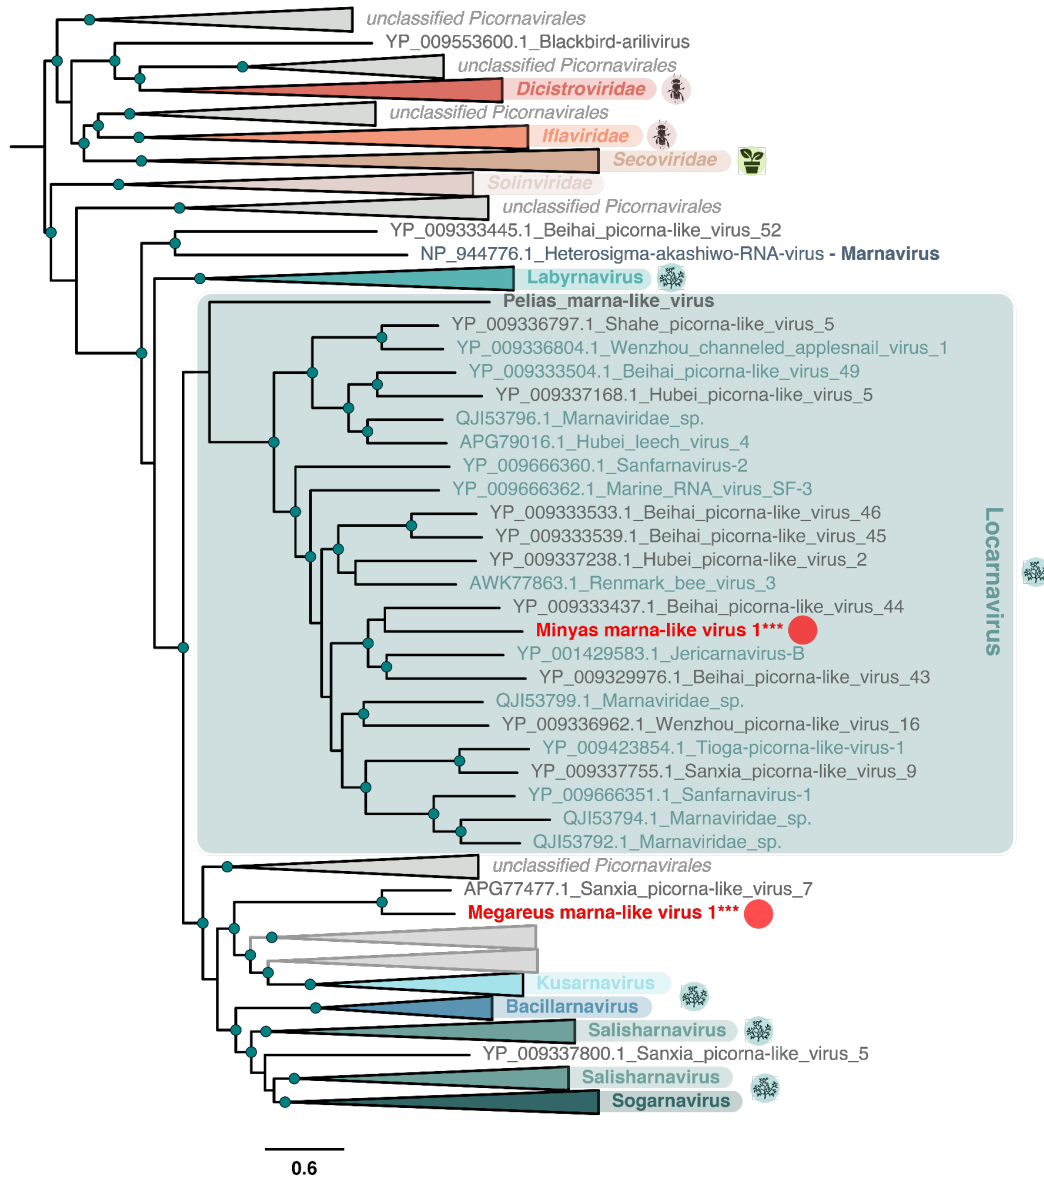

332

333 **Figure 6. Phylogeny of the Marnaviridae.** Sequences in grey indicate unclassified viruses  
 334 while those in bold refer to algae-associated viruses. Host lineages are indicated in circles to  
 335 the right of major viral clades and correspond to arthropods (pink), land plants (green), and  
 336 microalgae (blue). The new viral sequences identified in this study are indicated with a red  
 337 circle. The tree is mid-rooted and confident nodes (with SH-*alrt* likelihood ratio test values  
 338  $\geq 80\%$ ) are represented as orange circles. The scale bar depicts the number of amino acid  
 339 substitutions per site.

340

341 This identification of *Minyas marna-like virus 1* from the *N. oculata* culture provides  
 342 compelling evidence for a *Locarnavirus* directly associated with a unicellular microalga.  
 343 Along with the previous identification of the Dinophyceae-associated *Pelias marna-like*  
 344 *virus*<sup>20</sup> (Figure 6), this supports the idea of an extensive host range of locarnaviruses among  
 345 unicellular microalgae. The second *Marnaviridae*-like virus, *Megareus marna-like virus 1*,



346 forms a cluster with Sanxia picorna-like virus 7, falling in a position basal to Locarna-,  
347 Kusarna-, Bacillarna-, Salisharna- and Sogarnaviruses (Figure 6). It may therefore constitute  
348 a new genus of *Marnaviridae*<sup>22</sup>.

349

350 The short sequences of both Minyas marna-like virus 1 and Megareus marna-like virus 1  
351 and their average read coverages (Table 1, Figure A5) strongly suggest that only partial  
352 genomes have been recovered. The low quantities of RNA extracted from the *N. oculata*  
353 sample and corresponding fragmented RNAs likely explain the poor coverage for the  
354 corresponding viral contigs, and that RT-PCR targeting both viral and host sequences  
355 returned negatives (Figure A2). Additional studies are needed to achieve the genomic and  
356 biological characterisation of those new *Marnaviridae*-like viruses associated with the  
357 eustigmatophyte host *N. oculata*. In particular, if the two newly reported *Marnaviridae* caused  
358 lysis of the biofuel-producing *N. oculata* cells this could represent a major concern for  
359 industrial-scale production.

360

### 361 ***Divergent viruses identified using protein profiles and structural comparisons***

362 To help identify viruses in basal and divergent microbial eukaryotes, we also conducted an  
363 approach based on HMM and structural RdRp comparisons, using the newly developed  
364 RdRp-scan tool<sup>33</sup>. Briefly, ORFs were predicted from each orphan contig and compared to  
365 RdRp profiles using Hidden Markov Models<sup>33</sup>. Such a strategy is expected to detect distant  
366 homologs sharing less than 30% of identity with viral protein sequences available in the  
367 current databases. As a result, two additional viral RdRp sequences were identified as  
368 distantly homologous to Pisuviricota members (Figure 2).

369

370 Using RdRp-scan HMM profiles a remote Pisuviricota-like RdRp signal was identified as  
371 associated with *E. gracilis*. The complementary Phyre2-based homology search returned a  
372 strong hit to the picornavirus sicinivirus 3dpol RdRp, thus validating the Pisuviricota-like  
373 signal previously detected. As noted above, comparison with *E. gracilis* nuclear  
374 (GCA\_900893395) and mitochondrial (GCA\_001638955) revealed strong identities (Table  
375 A2). A very close sequence (7 SNPs at the genome level and 6 non-synonymous  
376 substitutions at the RdRp level) could also be retrieved from the SRA database sample  
377 (SRR2294740), corresponding to the mitochondrial genome of *E. gracilis*. Such a  
378 mitochondrial sub-location is also suggested by the ORF found that can be expressed using  
379 the Chlorophycean mitochondrial genetic code (Figure A5). Hence, this Pisuviri-like signal  
380 appears to part of the host genome, likely corresponding to an endogenous viral element.  
381 Notably, the presence of such EVEs will help identify divergent viruses infecting euglenoid

382 lineages, which are expected to be highly divergent considering the basal placement of  
383 euglenoids within eukaryotic organism diversity<sup>32</sup>.

384

385 The Phineus pisuviri-like virus 1, identified from *R. maculata*, was also confidently identified  
386 as a remote homolog of Pisuviricota RNA viruses using both RdRp-scan profiles and Phyre2  
387 server. Although its distant and basal position in the RNA virus phylogeny prevents a robust  
388 comparison with existing *Riboviria* clades, its genome of 6.4kb and the associated read  
389 coverage suggests the full-length genome was recovered. The genome encodes three ORFs  
390 that possess RdRp function at the C-terminus (Figure A5). No functions could be associated  
391 with the additional ORFs and further studies are required to characterise this newly identified  
392 protist-infecting virus.

393

#### 394 **Additional viruses**

395 While it does not constitute a novel virus, one contig assembled from the *R. maculata* was  
396 retrieved in very high quantity and identical to the Despoena mito-like virus (Table 1),  
397 previously reported in another *R. maculata* sample<sup>20</sup>. This strongly reinforces the proposition  
398 of a Despoena mito-like virus infecting the red algal host and more generally the  
399 establishment of a mitovirus sub-clade that are able to infect microalgae<sup>20</sup>. Finally, our  
400 unbiased metagenomic analysis also retrieved additional viruses related to *Tombusviridae*,  
401 with identical sequences identified across several unrelated samples. It is very likely that  
402 these sequences result from contamination from kits or water used to extract or prepare  
403 RNA and cDNA libraries and were thus discarded from this study.

404

#### 405 **Virus-Host assumptions based on the composition of microalgal cultures**

406 The composition of the major kingdoms present in each sample was obtained by comparing  
407 contigs to the nt and nr database. The corresponding proportions as well as the abundance  
408 of contigs without a detectable match in nt or nr are shown in Figure 7. Bacteria-associated  
409 contigs are present within the libraries, especially those from *Nannochloropsis* and *Rhodella*,  
410 in line with the commonly reported microalgal-bacteria interactions<sup>57</sup>. Bacterial and  
411 eukaryotic viruses are usually too distantly related to be confounded. The presence of  
412 bacterial organisms in the samples is therefore not expected to interfere with our assumption  
413 that viruses identified as sharing homology with eukaryotic viruses very likely infect  
414 eukaryotic microalgal hosts. Remarkably, the proportion of undetected hits, without any  
415 match in nt and nr databases, is highly variable between libraries, ranging from less than  
416 15% in the *T. weissflogii* sample to 40% in *G. carpenteri* culture (Figure 7A). This high  
417 variation likely arises from the lack of microalgal genomic and proteomic sequences in NCBI  
418 nt and nr databases, with genomic sequences available only for half of the microalgal hosts

419 analysed here (Table A2). Such discrepancies in nucleotide and protein sequence  
 420 assignment and abundance are further amplified in cases of highly abundant transcripts,  
 421 such as ribosomal RNA, which very likely remain in the sample.  
 422

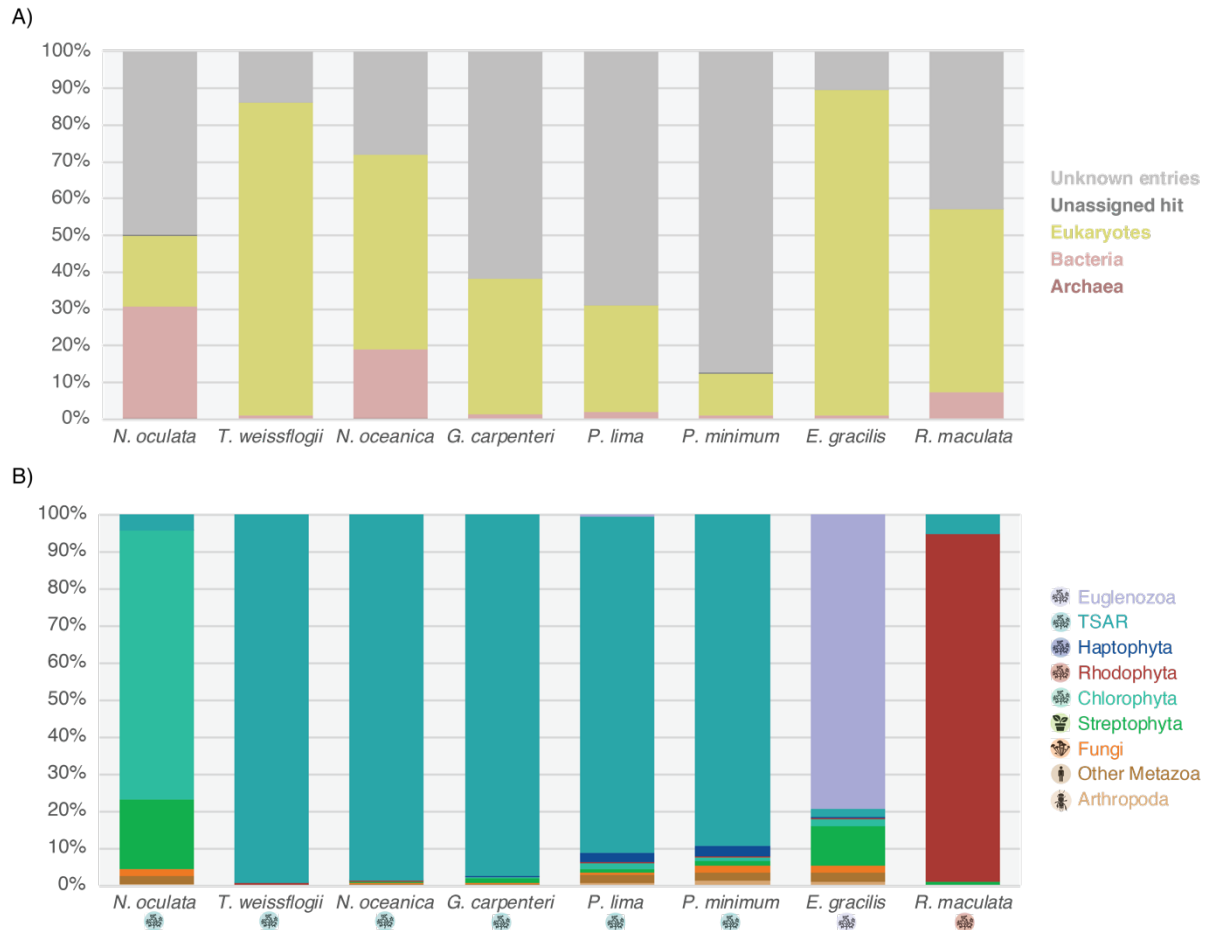

423 **Figure 7. Relative abundance of contigs in microalgae libraries based on their**  
 424 **assignment to major cellular organism clades.** Contigs were assigned according to the  
 425 taxonomy of their best Blast hits. Percentages of each contig were based on the abundance  
 426 values and correspond to the sum of all contig TPM values belonging to each taxonomy  
 427 clade. (A) Relative abundance of contigs associated with Kingdoms Archaea (dark pink),  
 428 Bacteria (light pink) and Eukaryota (light yellow) using both BLASTn and BLASTx. The  
 429 abundance of contigs with nt or nr entries lacking a taxonomy assignment are indicated in  
 430 dark grey, while those without any nt or nr matches detected are indicated in light grey. (B)  
 431 Relative abundances of contigs associated with major eukaryotic clades using BLASTx. Low  
 432 abundance clades, counting for less than 0.5% of the total contig abundance, are not  
 433 represented. TSAR: Telonemids-Stramenopiles-Alveolates-Rhizaria group as defined in  
 434 ref.<sup>32</sup>.  
 435

436

437 While many unassigned entries in most of the samples analysed here can limit the formal  
438 assignment of viruses to hosts, obtaining a clearer picture of the eukaryotic host sequences  
439 present in the sample and their relative abundance can help to discriminate between  
440 eukaryotic hosts. Indeed, our cultures were washed several times before RNA extraction. It  
441 is therefore likely that the viral sequences identified result from intracellular viral forms rather  
442 than extracellular virions circulating in the culture media: hence, we assume that viruses  
443 detected in this study are associated with cellular organisms that are also present in the  
444 sample. We therefore examined the deep taxonomy of BLASTx eukaryotic-like contigs as  
445 well as the total contig abundance reported for major eukaryotic lineages (Figure 7B), which  
446 helped discriminate potential hosts for the most uncertain assignments. Accordingly, the very  
447 low abundance of fungi and land plant-associated sequences in *G. carpenteri* (Figure 7B)  
448 could constitute additional evidence for a microalgae-infecting endornavirus, even though  
449 members of the *Endornaviridae* have been traditionally associated to fungi or land plants  
450 (Streptophyta).

451

452 In the case of the Phineus pisuviri-like virus 1 identified from *R. maculata*, the majority of  
453 detectable contigs belong to the corresponding Rhodophyta host taxa, suggesting that this  
454 virus is likely associated with a Rhodophyte host rather than fungi or other contaminant  
455 organisms. The very large proportion of contigs associated with land plants (Streptophyta) in  
456 the *N. oculata* library might correspond to contamination. However, the unambiguous  
457 placement of the corresponding Minyas marna-like virus 1 virus within the well-established  
458 microalgae-infecting *Marnaviridae* provides a strong argument that this virus is associated  
459 with diatoms.

460

## 461 **Conclusions**

462 Through metatranscriptomic sequencing of total RNA from microalgae cultures we identified  
463 ten new RNA viruses associated with diatom, eustigmatophyte, dinoflagellate and  
464 rhodophyte microalgae. These newly discovered viruses contribute to the establishment of  
465 new microalgae-infecting viral clades within the *Totiviridae* and *Partitiviridae*, as well as the  
466 enrichment of the positive single-stranded picorna-like family *Marnaviridae*. This study also  
467 extended the host range of the dsRNA *Endornaviruses* to microalgae, raising questions  
468 about how this viral family is able to infect the plant, fungi and TSAR eukaryotic  
469 supergroups. Considering the harmful or commercial value of their hosts, this description of  
470 new microalgal viruses paves the way for further studies of the effects of viral infections on  
471 host biology and their associated ecological and industrial consequences. Finally, this study  
472 highlights the need to reveal the hidden diversity among RNA viruses infecting microalgae,

473 and to microbial eukaryotes in general, particularly considering their fundamental and  
474 applied importance.

475

476

## 477 **Materials and Methods**

### 478 ***Algae cultures***

479 Microalgal cultures were maintained on a 12:12 light:dark cycle at 100  $\mu\text{mol m}^{-2} \text{s}^{-1}$ .

480 Culture media and temperature conditions were specific to each species and were as

481 follows: *Nannochloropsis oceanica* 24°C, f/2 medium; *Nannochloropsis oculata* 24°C, f/2

482 medium; *Thalassiosira weissflogii* 20°C, f/2 medium; *Rhodella maculata* 24°C, L1 medium

483 (minus Si); *Euglena gracilis* 20°C, Euglena medium; *Prorocentrum cf. balticum*

484 (UTSPH2D4)<sup>48</sup>; 20°C K medium-Si; *Prorocentrum lima* 25°C modified K medium<sup>58</sup>;

485 *Gambierdiscus carpenteri* (UTSHI2C4) 25°C modified K medium<sup>48,59</sup>. To harvest each

486 microalgal culture, the cells from 100-250 mL were pelleted by centrifugation at 200g for 4

487 mins and the supernatant discarded. The cells were then resuspended in 5 mL of artificial

488 seawater and centrifuged again at 200g for 4 mins. This wash step was repeated twice more

489 before a final centrifugation step at 1,000g for 4 mins followed by storage at -80°C until RNA

490 extraction.

491

### 492 ***Total RNA extraction and sequencing***

493 Total RNA from the diatom (*T. weissflogii*) and Euglenozoa (*E. gracilis*) cultures were

494 extracted using the RNeasy Plus Universal kit (Qiagen), according to the manufacturer's

495 instructions. Qiazol lysis buffer was then added to frozen pellets, and homogenisation was

496 performed by pipetting. Genomic DNA was removed and RNAs extracted using 1-3 bromo-

497 chloropropane. Supernatants were then transferred to Qiagen columns. After washing the

498 columns, pure RNAs were collected into sterile water strictly following kit instructions.

499

500 Total RNA from dinoflagellates (*P. lima*, *P. cf. balticum*, *G. carpenteri*), the Rhodophyta *R.*

501 *maculata* and the eustigmatophyte (*N. oceanica* and *N. oculata*) cultures was extracted

502 using Allprep DNA/RNA kit (Qiagen), following the manufacturer instructions. Briefly, frozen

503 cell pellets were supplanted with lysis RLT buffer and cells disrupted using bead beating with

504 0.5mm glass beads. An additional step of sample homogenisation using QIAshredder

505 (Qiagen) was added during the RNA extraction of *R. maculata* sample and *N. oceanica* to

506 reduce the viscosity of eluates. Cell debris was removed using a centrifugation step at high

507 speed and the supernatants transferred to Qiagen columns. Total RNA fractions were then

508 purified after several washing steps and eluted according to kit instructions.

509

510 ***RNA sequencing***

511 RNA quality was checked using a TapeStation and individually converted by the Australian  
512 Genome Research Facility (AGRF, Melbourne) into non-rRNA RNAseq libraries using  
513 TruSeq Stranded Total RNA with Ribo-Zero Plant (Illumina). Due to the very low RNA yields  
514 obtained for *Nannochloropsis oculata* and *Nannochloropsis oceanica*, these two libraries  
515 were prepared using the SMARTer Stranded Total RNA-Seq Kit v2—Pico Input Mammalian  
516 libraries (Takara Bio, Mountain View, CA, USA). The corresponding libraries were  
517 sequenced on the NovaSeq platform (Illumina) (paired-end, 150bp) by the AGRF.

518

519 ***RNA-Seq data pre-processing: Read trimming, rRNA depletion and contig assembly***

520 Total reads were filtered using Trimmomatic (v0.36)<sup>60</sup> to remove low-quality and Illumina  
521 adapters. To maximize the completeness of the ribosomal (r) RNA depletion performed  
522 during library prep, the remaining rRNA reads were removed using the SortmeRNA program  
523 (2.1b)<sup>61</sup>. Filtered reads were then assembled into contigs using Trinity (v 2.5.1)<sup>62</sup> and  
524 abundances (expected count and TPM) calculated using RSEM (v 1.3.1)<sup>63</sup>.

525

526 ***Sample taxa composition***

527 To help determine the taxa composition of each library, all contig sequences were compared  
528 to the non-redundant protein database nr from NCBI using Diamond BLASTx (v 2.0.9)<sup>64</sup> and  
529 to the nucleotide database nt from NCBI using BLAST (v 2.2.30). The best hits were  
530 reported for each contig and their corresponding taxonomy analysed. For each library,  
531 contigs were grouped into major eukaryotic taxa and relative abundance determined as the  
532 sum of all the TPM (transcripts per million) within each taxon.

533

534 ***RNA virus identification***

535 *Sequence-based similarity detection*

536 RdRp sequences corresponding to RNA viruses (i.e. the *Riboviria*) were first identified by  
537 comparing contigs to the nr database using Diamond Blastx (v 2.0.9 ; e-value < 1e-05)<sup>64</sup>. To  
538 maximize the detection of RNA viruses, putative virus sequences identified from nr BLASTx  
539 as well as those previously obtained in an algae virus study<sup>20</sup> were used as a database to  
540 perform a second round of BLASTx using contig libraries as queries and employing the  
541 same parameters as previously. The resulting RNA virus-like sequences were then  
542 submitted to the nr database (NCBI) and hits with the best match in cellular organism  
543 sequences were treated as false-positives and discarded from the analysis.

544

545 *HMM-based homology detection of ORFans*



546 All orphan contig sequences (i.e., that had no match in the nr database) were compared to  
547 the RdRp HMM-profiles of the RdRp-scan resource<sup>33</sup> and using the HMMer3 program  
548 (v3.3)<sup>65</sup>.

549

#### 550 *Genome extension, Genome coverage and Virus annotation*

551 To ensure all the RNA virus-like sequences could be identified and in their longest form,  
552 additional attempts to assemble contigs were performed using the rnaSPADES (v3.13.0)<sup>66</sup>  
553 and Megahit programs (v1.2.9)<sup>67</sup>. This did not identify additional or longer RNA virus  
554 sequences. A manual elongation step was performed on viral candidates using Geneious  
555 (v11.1.4)<sup>68</sup>. A virus annotation to identify RdRp motifs was performed using InterProScan<sup>69</sup>  
556 and RdRp-scan<sup>33</sup>. Genome coverage profiles were obtained by mapping the non-rRNA  
557 reads back to each contig sequence using Bowtie2 (v2.3.3.1)<sup>70</sup> and Samtools (v1.6)<sup>71</sup>. The  
558 resulting SAM files were then plotted onto viral genomes using Geneious (v11.1.4)<sup>68</sup>.

559

#### 560 *SRA mining*

561 To help retrieve complete genome sequences, assess intra-species variability and help  
562 associate viruses with particular algae hosts, we performed an additional step of Sequence  
563 Read Archive (SRA) mining for each of the ten new viruses identified in this study. For each  
564 algae library, we screened the SRA using nucleotide Magic-Blast (v1.3.0)<sup>72</sup>. When the  
565 number of hits exceeded 100, the corresponding SRA reads were mapped to the viral  
566 genome using Bowtie2 (v2.3.3.1)<sup>70</sup> and SAMtools (v1.6)<sup>71</sup>.

567

#### 568 *Phylogenetic analysis*

569 RNA virus phyla-level comparisons were performed using Clustal Omega (v1.2.4)<sup>73</sup> to  
570 directly compare the newly identified sequences to the pre-built RdRp alignments from the  
571 RdRp-scan resource<sup>33</sup>. Initial phylogenetic trees were inferred using the maximum likelihood  
572 method available in FastTREE (v2.1.9; default parameters)<sup>74</sup>. Sub-alignments at the RNA  
573 virus order or family scale were then obtained using Clustal Omega (v1.2.4)<sup>73</sup> and manually  
574 checked using Geneious (v11.1.4)<sup>68</sup>. Maximum likelihood phylogenies of these sub-  
575 alignments were then inferred using the IQ-TREE package (v2.0-rc1)<sup>75</sup> with the best-fit  
576 amino acid substitution model obtained with ModelFinder Plus<sup>76</sup> and using a Shimodaira-  
577 Hasegawa approximate-likelihood ratio and 1000 replicates (-alrt 1000) to assess nodal  
578 support.

579

#### 580 ***RT-PCR confirmation***

581 To experimentally confirm viral contigs assembled from RNAseq data, cDNAs from each  
582 total RNAs were first obtained using the SuperScript IV reverse transcriptase (Invitrogen).



583 PCRs were then performed on each cDNA sample using corresponding host and virus  
584 primers (detailed in Table A4) using the Platinum SuperFi II DNA polymerase (Invitrogen)  
585 and following manufacturer instructions.

586

#### 587 **Data availability**

588 Corresponding RNAseq read files will be available on the SRA under BioProject XXX, with  
589 accessions XXXX. Newly identified viral sequences will be deposited and available at  
590 GenBank/NCBI under the accessions XXXX.

591

#### 592 **Acknowledgments**

593 We thank Jean-Baptiste Raina for his useful comments on host compositions. ECH is  
594 supported by an Australian Research Council Australian Laureate Fellowship  
595 (FL170100022).

596

#### 597 **References**

- 598 1. Simmonds, P. *et al.* Virus taxonomy in the age of metagenomics. *Nat. Rev. Microbiol.*  
599 **15**, 161–168 (2017).
- 600 2. Suttle, C. A. Marine viruses — major players in the global ecosystem. *Nat. Rev.*  
601 *Microbiol.* **5**, 801–812 (2007).
- 602 3. Wang, D.-Z. Neurotoxins from Marine Dinoflagellates: A Brief Review. *Mar. Drugs* **6**,  
603 349 (2008).
- 604 4. Barkia, I., Saari, N. & Manning, S. R. Microalgae for High-Value Products Towards  
605 Human Health and Nutrition. *Mar. Drugs* **17**, 304 (2019).
- 606 5. Barolo, L. *et al.* Perspectives for Glyco-Engineering of Recombinant  
607 Biopharmaceuticals from Microalgae. *Cells* **9**, 633 (2020).
- 608 6. Chew, K. W. *et al.* Microalgae biorefinery: High value products perspectives.  
609 *Bioresour. Technol.* **229**, 53–62 (2017).
- 610 7. Harun, R., Singh, M., Forde, G. M. & Danquah, M. K. Bioprocess engineering of  
611 microalgae to produce a variety of consumer products. *Renew. Sustain. Energy Rev.*  
612 **14**, 1037–1047 (2010).
- 613 8. Zhu, Z., Jiang, J. & Fa, Y. Overcoming the Biological Contamination in Microalgae and  
614 Cyanobacteria Mass Cultivations for Photosynthetic Biofuel Production. *Molecules* **25**,  
615 (2020).
- 616 9. Tai, V. *et al.* Characterization of HaRNAV, a single-stranded RNA virus causing lysis  
617 of *Heterosigma akashiwo* (Raphidophyceae). *J. Phycol.* **39**, 343–352 (2003).
- 618 10. Cobbin, J. C., Charon, J., Harvey, E., Holmes, E. C. & Mahar, J. E. Current  
619 challenges to virus discovery by meta-transcriptomics. *Curr. Opin. Virol.* **51**, 48–55

- 620 (2021).
- 621 11. Wolf, Y. I. *et al.* Doubling of the known set of RNA viruses by metagenomic analysis of  
622 an aquatic virome. *Nat. Microbiol.* **5**, 1262–1270 (2020).
- 623 12. Shi, M. *et al.* Redefining the invertebrate RNA virosphere. *Nature* **540**, 539–543  
624 (2016).
- 625 13. Zayed, A. A. *et al.* Cryptic and abundant marine viruses at the evolutionary origins of  
626 Earth’s RNA virome. *Science* **376**, 156–162 (2022).
- 627 14. Culley, A. I., Lang, A. S. & Suttle, C. A. Metagenomic analysis of coastal RNA virus  
628 communities. *Science* **312**, 1795–1798 (2006).
- 629 15. Lang, A. S., Rise, M. L., Culley, A. I. & Steward, G. F. RNA viruses in the sea. *FEMS*  
630 *Microbiol. Rev.* **33**, 295–323 (2009).
- 631 16. Urayama, S. *et al.* Unveiling the RNA virosphere associated with marine  
632 microorganisms. *Mol. Ecol. Resour.* **18**, 1444– 1455 (2018).
- 633 17. Culley, A. I. *et al.* The characterization of RNA viruses in tropical seawater using  
634 targeted PCR and metagenomics. *MBio* **5**, e01210-14 (2014).
- 635 18. Chiba, Y. *et al.* Viral RNA Genomes Identified from Marine Macroalgae and a Diatom.  
636 *Microbes Environ.* **35**, ME20016 (2020).
- 637 19. Charon, J., Marcelino, V. R., Wetherbee, R., Verbruggen, H. & Holmes, E. C.  
638 Metatranscriptomic Identification of Diverse and Divergent RNA Viruses in Green and  
639 Chlorarachniophyte Algae Cultures. *Viruses* **12**, 1180 (2020).
- 640 20. Charon, J., Murray, S. & Holmes, E. C. Revealing RNA virus diversity and evolution in  
641 unicellular algae transcriptomes. *Virus Evol.* **7**, veab070 (2021).
- 642 21. Chase, E. E. *et al.* A high rate algal pond hosting a dynamic community of rna viruses.  
643 *Viruses* **13**, 2163 (2021).
- 644 22. Vlok, M., Lang, A. S. & Suttle, C. A. Application of a sequence-based taxonomic  
645 classification method to uncultured and unclassified marine single-stranded RNA  
646 viruses in the order Picornvirales. *Virus Evol.* **5**, vez056 (2019).
- 647 23. Sadeghi, M., Tomaru, Y. & Ahola, T. RNA Viruses in Aquatic Unicellular Eukaryotes.  
648 *Viruses* **13**, 362 (2021).
- 649 24. Urayama, S. I., Takaki, Y. & Nunoura, T. FLDS: A comprehensive DSRNA  
650 sequencing method for intracellular RNA virus surveillance. *Microbes Environ.* **31**, 33–  
651 40 (2016).
- 652 25. Lachnit, T., Thomas, T. & Steinberg, P. Expanding our understanding of the seaweed  
653 holobiont: RNA Viruses of the Red Alga *Delisea pulchra*. *Front. Microbiol.* **6**, 1489  
654 (2016).
- 655 26. Rousvoal, S., Bouyer, B., López-Cristoffanini, C., Boyen, C. & Collén, J. Mutant  
656 swarms of a totivirus-like entities are present in the red macroalga *Chondrus crispus*

- 657 and have been partially transferred to the nuclear genome. *J. Phycol.* **52**, 493–504  
658 (2016).
- 659 27. Tomaru, Y. *et al.* Isolation and characterization of two distinct types of HcRNAV, a  
660 single-stranded RNA virus infecting the bivalve-killing microalga *Heterocapsa*  
661 *circularisquama*. *Aquat. Microb. Ecol.* **34**, 207–218 (2004).
- 662 28. Waldron, F. M., Stone, G. N. & Obbard, D. J. Metagenomic sequencing suggests a  
663 diversity of RNA interference-like responses to viruses across multicellular  
664 eukaryotes. *PLoS Genet.* **14**, e1007533 (2018).
- 665 29. Lang, A. S., Culley, A. I. & Suttle, C. A. Genome sequence and characterization of a  
666 virus (HaRNAV) related to picorna-like viruses that infects the marine toxic bloom-  
667 forming alga *Heterosigma akashiwo*. *Virology* **320**, 206–217 (2004).
- 668 30. Takao, Y., Mise, K., Nagasaki, K., Okuno, T. & Honda, D. Complete nucleotide  
669 sequence and genome organization of a single-stranded RNA virus infecting the  
670 marine fungoid protist *Schizochytrium* sp. *J. Gen. Virol.* **87**, 723–733 (2006).
- 671 31. Attoui, H. *et al.* *Micromonas pusilla* reovirus: A new member of the family Reoviridae  
672 assigned to a novel proposed genus (Mimoreovirus). *J. Gen. Virol.* **87**, 1375–1383  
673 (2006).
- 674 32. Burki, F., Roger, A. J., Brown, M. W. & Simpson, A. G. B. The New Tree of  
675 Eukaryotes. *Trends in Ecology and Evolution* **35**, 43–55 (2020).
- 676 33. Charon, J., Buchmann, J. P., Sadiq, S. & Holmes, E. C. RdRp-scan: A Bioinformatic  
677 Resource to Identify and Annotate Divergent RNA Viruses in Metagenomic Sequence  
678 Data. *bioRxiv* (2022). doi:10.1101/2022.02.28.482397
- 679 34. Fichorova, R. N. *et al.* Endobiont Viruses Sensed by the Human Host – Beyond  
680 Conventional Antiparasitic Therapy. *PLoS One* **7**, e48418 (2012).
- 681 35. Grybchuk, D., Kostygov, A. Y., Macedo, D. H., d'Avila-Levy, C. M. & Yurchenko, V.  
682 RNA viruses in trypanosomatid parasites: a historical overview. *Mem. Inst. Oswaldo*  
683 *Cruz* **113**, e170487 (2018).
- 684 36. Ghabrial, S. A. & Nibert, M. L. Victorivirus, a new genus of fungal viruses in the family  
685 Totiviridae. *Arch. Virol.* **154**, 373–379 (2009).
- 686 37. Ghabrial, S. A. Totiviruses. *Encycl. Virol.* 163–174 (2008). doi:10.1016/B978-  
687 012374410-4.00518-5
- 688 38. Lefkowitz, E. J. *et al.* Virus taxonomy: the database of the International Committee on  
689 Taxonomy of Viruses (ICTV). *Nucleic Acids Res.* **46**, D708–D717 (2018).
- 690 39. Hartley, M. A., Ronet, C., Zangger, H., Beverley, S. M. & Fasel, N. *Leishmania* RNA  
691 virus: when the host pays the toll. *Front. Cell. Infect. Microbiol.* **2**, 99 (2012).
- 692 40. Ives, A. *et al.* *Leishmania* RNA virus controls the severity of mucocutaneous  
693 leishmaniasis. *Science* **331**, 775–8 (2011).

- 694 41. Liu, J. J. *et al.* Characterization of *Cronartium ribicola* dsRNAs reveals novel members  
695 of the family Totiviridae and viral association with fungal virulence. *Viol. J.* **16**, 118  
696 (2019).
- 697 42. Fukuhara, T. Endornaviruses: persistent dsRNA viruses with symbiotic properties in  
698 diverse eukaryotes. *Virus Genes* **55**, 165–173 (2019).
- 699 43. Okada, R. *et al.* Bell pepper endornavirus: molecular and biological properties, and  
700 occurrence in the genus *Capsicum*. *J. Gen. Virol.* **92**, 2664–2673 (2011).
- 701 44. Okada, R. *et al.* Molecular characterization of two evolutionarily distinct  
702 endornaviruses co-infecting common bean (*Phaseolus vulgaris*). *J. Gen. Virol.* **94**,  
703 220–229 (2013).
- 704 45. Hacker, C. V., Brasier, C. M. & Buck, K. W. A double-stranded RNA from a  
705 *Phytophthora* species is related to the plant endornaviruses and contains a putative  
706 UDP glycosyltransferase gene. *J. Gen. Virol.* **86**, 1561–1570 (2005).
- 707 46. Sabanadzovic, S., Wintermantel, W. M., Valverde, R. A., McCreight, J. D. &  
708 Aboughanem-Sabanadzovic, N. Cucumis melo endornavirus: Genome organization,  
709 host range and co-divergence with the host. *Virus Res.* **214**, 49–58 (2016).
- 710 47. Roossinck, M. J., Sabanadzovic, S., Okada, R. & Valverde, R. A. The remarkable  
711 evolutionary history of endornaviruses. *J. Gen. Virol.* **92**, 2674–2678 (2011).
- 712 48. Larsson, M.E. *et al.* Mucospheres produced by a mixotrophic protist impact ocean  
713 carbon cycling. *Nat. Commun.* **13**, 1301 (2022).
- 714 49. Roossinck, M. J. Lifestyles of plant viruses. *Philos. Trans. R. Soc. B Biol. Sci.* **365**,  
715 1899–1905 (2010).
- 716 50. Nibert, M. L. *et al.* Taxonomic reorganization of family Partitiviridae and other recent  
717 progress in partitivirus research. *Virus Research* **188**, 128–141 (2014).
- 718 51. Shiba, K. *et al.* Genome sequence of a novel partitivirus identified from the oomycete  
719 *Pythium nunn*. *Arch. Virol.* **163**, 2561–2563 (2018).
- 720 52. Nibert, M. L., Woods, K. M., Upton, S. J. & Ghabrial, S. A. Crispovirus: a new genus  
721 of protozoan viruses in the family Partitiviridae. *Arch. Virol.* **154**, 1959–1965 (2009).
- 722 53. Park, D., Goh, C. J., Kim, H. & Hahn, Y. Identification of Two Novel Amalgaviruses in  
723 the Common Eelgrass (*Zostera marina*) and in Silico Analysis of the Amalgavirus +1  
724 Programmed Ribosomal Frameshifting Sites. *Plant Pathol. J.* **34**, 150–156 (2018).
- 725 54. Walker, P. J. *et al.* Changes to virus taxonomy and the Statutes ratified by the  
726 International Committee on Taxonomy of Viruses (2020). *Arch. Virol.* **165**, 2737–2748  
727 (2020).
- 728 55. Telengech, P. *et al.* Diverse Partitiviruses From the Phytopathogenic Fungus,  
729 *Rosellinia necatrix*. *Front. Microbiol.* **11**, 1064 (2020).
- 730 56. Pan, Y., Cembella, A. D. & Quilliam, M. A. Cell cycle and toxin production in the

- 731 benthic dinoflagellate *Prorocentrum lima*. *Mar. Biol.* **134**, 541–549 (1999).
- 732 57. Bolch, C. J. S., Subramanian, T. A. & Green, D. H. The toxic dinoflagellate  
733 *gymnodinium catenatum* (Dinophyceae) Requires marine bacteria for growth. *J.*  
734 *Phycol.* **47**, 1009–1022 (2011).
- 735 58. Litaker, R. W. *et al.* Taxonomy of *Gambierdiscus* including four new species,  
736 *Gambierdiscus caribaeus*, *Gambierdiscus carolinianus*, *Gambierdiscus carpenteri* and  
737 *Gambierdiscus ruetzleri* (Gonyaulacales, Dinophyceae). *Phycologia* **48**, 344–390  
738 (2009).
- 739 59. Kretzschmar, A. L., Larsson, M. E., Hoppenrath, M., Doblin, M. A. & Murray, S. A.  
740 Characterisation of Two Toxic *Gambierdiscus* spp. (Gonyaulacales, Dinophyceae)  
741 from the Great Barrier Reef (Australia): *G. lewisii* sp. nov. and *G. holmesii* sp. nov.  
742 *Protist* **170**, 125699 (2019).
- 743 60. Bolger, A. M., Lohse, M. & Usadel, B. Trimmomatic: a flexible trimmer for Illumina  
744 sequence data. *Bioinformatics* **30**, 2114–2120 (2014).
- 745 61. Kopylova, E., Noé, L. & Touzet, H. SortMeRNA: fast and accurate filtering of  
746 ribosomal RNAs in metatranscriptomic data. *Bioinformatics* **28**, 3211–3217 (2012).
- 747 62. Grabherr, M. G. *et al.* Full-length transcriptome assembly from RNA-Seq data without  
748 a reference genome. *Nat. Biotechnol.* **29**, 644–652 (2011).
- 749 63. Li, B. & Dewey, C. N. RSEM: accurate transcript quantification from RNA-Seq data  
750 with or without a reference genome. *BMC Bioinformatics* **12**, 323 (2011).
- 751 64. Buchfink, B., Xie, C. & Huson, D. H. Fast and sensitive protein alignment using  
752 DIAMOND. *Nat. Methods* **12**, 59–60 (2015).
- 753 65. Eddy, S. R. Accelerated profile HMM searches. *PLoS Comput. Biol.* **7**, e1002195  
754 (2011).
- 755 66. Bushmanova, E., Antipov, D., Lapidus, A. & Prjibelski, A. D. rnaSPAdes: a de novo  
756 transcriptome assembler and its application to RNA-Seq data. *Gigascience* **8**, 1–13  
757 (2019).
- 758 67. Li, D., Liu, C.-M., Luo, R., Sadakane, K. & Lam, T.-W. MEGAHIT: an ultra-fast single-  
759 node solution for large and complex metagenomics assembly via succinct de Bruijn  
760 graph. *Bioinformatics* **31**, 1674–1676 (2015).
- 761 68. Kearse, M. *et al.* Geneious Basic: An integrated and extendable desktop software  
762 platform for the organization and analysis of sequence data. *Bioinformatics* **28**, 1647–  
763 1649 (2012).
- 764 69. Jones, P. *et al.* InterProScan 5: genome-scale protein function classification.  
765 *Bioinformatics* **30**, 1236–1240 (2014).
- 766 70. Langmead, B. & Salzberg, S. L. Fast gapped-read alignment with Bowtie 2. *Nat.*  
767 *Methods* **9**, 357–359 (2012).

- 768 71. Li, H. *et al.* The Sequence Alignment/Map format and SAMtools. *Bioinformatics* **25**,  
769 2078–2079 (2009).
- 770 72. Boratyn, G. M., Thierry-Mieg, J., Thierry-Mieg, D., Busby, B. & Madden, T. L. Magic-  
771 BLAST, an accurate RNA-seq aligner for long and short reads. *BMC Bioinformatics*  
772 **20**, 1–19 (2019).
- 773 73. Sievers, F. *et al.* Fast, scalable generation of high-quality protein multiple sequence  
774 alignments using Clustal Omega. *Mol. Syst. Biol.* **7**, 539–539 (2014).
- 775 74. Price, M. N., Dehal, P. S. & Arkin, A. P. FastTree 2 – Approximately Maximum-  
776 Likelihood Trees for Large Alignments. *PLoS One* **5**, e9490 (2010).
- 777 75. Nguyen, L.-T., Schmidt, H. A., Haeseler, A. von & Minh, B. Q. IQ-TREE: A fast and  
778 effective stochastic algorithm for estimating maximum-likelihood phylogenies. *Mol.*  
779 *Biol. Evol.* **32**, 268–274 (2015).
- 780 76. Kalyaanamoorthy, S., Minh, B. Q., Wong, T. K. F., von Haeseler, A. & Jermini, L. S.  
781 ModelFinder: fast model selection for accurate phylogenetic estimates. *Nat. Methods*  
782 **14**, 587–589 (2017).
- 783
